# Supplementary material for: RISC-interacting clearing 3’- 5’ exoribonucleases (RICEs) degrade uridylated cleavage fragments to maintain functional RISC in Arabidopsis thaliana
Source: eLife journal article supplement (doi:10.7554/elife.24466), 2017-05-02
Supplement: supp [file elife_poa_e24466_Supplementary_File_2.xlsx]

## Sheet: Sheet1
Supplementary file 2. Statistics of crystallographic analysis for RICE1.
RICE1
Data collection
Space group	I4122
Cell dimensions
a, b, c (Å)	193.25, 193.25, 214.72
α, β, γ (o)	90.0, 90.0, 90.0
Resolution (Å)	2.95 (3.00 to 2.95)*
Rsym or Rmerge	10.9% (0.609)
I/σI	20.9 (3.0)
Completeness (%)	99.8 (100.0)
Refinement
Resolution (Å)	2.95
No. reflections	42953
Rsym / Rmerge	16.9%/19.5%
No. atoms
Protein	4857
Ligand/ion	0
Water	0
B-factors
Protein	53.2
R.m.s. deviations
Bond lengths (Å)	0.008
Bond angles (o)	1.14
Ramachandran plot
Most favored	0.912
additional allowed	0.085
generously allowed	0.004
disallowed	0
