# Supplementary material for: RISC-interacting clearing 3’- 5’ exoribonucleases (RICEs) degrade uridylated cleavage fragments to maintain functional RISC in Arabidopsis thaliana
Source: eLife. 2017 May 2;6:e24466. doi: 10.7554/eLife.24466 (PMC5451212; doi:10.7554/eLife.24466)
Supplement: Supplementary file 1. — (A) Quantification of miRNA expression in artificial miRNA knockdown lines. (B) Quantification of miRNA expression in catalytically-inactive mutants. (C) Quantification of miRNA/miRNA* expression in catalytically-inactive mutants. (D) Expression pattern of miRNAs in wild type and 35S-HA-RICE1 D52A transgenic plants. (E) Expression pattern of miRNA* in wild type and 35S-HA-RICE1 D52A transgenic plants. (F) Ratio of miRNA/miRNA* in wild type and 35S-HA-RICE1 D52A transgenic plants. (G) Primers and oligos used in this study. DOI: http://dx.doi.org/10.7554/eLife.24466.019 [file elife-24466-supp1.xlsx]

## Sheet: A
Supplementary File 1A. Quantification of miRNA expression in artificial miRNA knockdown lines
	Ler	pnh-2	Ler;35S-amiR-RICE2 #1	Ler;35S-amiR-RICE2 #32	Ler;35S-amiR-RICE1 #7	Ler;35S-amiR-RICE1 #29	Ler;35S-amiR-RICEs #5	Ler;35S-amiR-RICEs #22
miR166	1	1.23±0.06	0.93 ± 0.12	0.90 ± 0.10	0.90 ± 0.10	0.97 ± 0.15	0.53 ± 0.12	0.60 ± 0.10
miR164	1	0.85 ± 0.07	1.05 ± 0.21	0.90 ± 0.00	0.90 ± 0.14	1.00 ± 0.14	0.55 ± 0.07	0.70 ± 0.00
miR390	1	0.85 ± 0.07	1.15 ± 0.07	1.05 ± 0.21	0.90 ± 0.14	1.00 ± 0.14	0.60 ± 0.14	0.60 ± 0.14
p-value (Paired t-test)		0.0198039	0.42265	0.225403	0.225403	0.741801	0.0198039	0.0202041
		0.0903345	0.795167	0.0903345	0.5	0.5	0.0374051	0.0111676
		0.204833	0.204833	0.795167	0.5	1	0.155958	0.155958

## Sheet: B
Supplementary File 1B. Quantification of miRNA expression in catalytically-defective mutants
	Ler	pnh-2	Ler;35S-HA-RICE1 #7	Ler;35S-HA-RICE1 #24
miR158	1	0.60 ± 0.10	0.67 ± 0.06	0.37 ± 0.15
miR164	1	0.67 ± 0.12	0.33 ± 0.06	0.23 ± 0.06
miR166	1	1.33 ± 0.23	0.50 ± 0.10	0.37 ± 0.15
miR390	1	0.65 ± 0.12	0.65 ± 0.07	0.45 ± 0.07
siR255	1	0.75 ± 0.07	0.55 ± 0.07	0.41 ± 0.01
p-value (Paired t-test)		0.02	0.01	0.02
		0.04	0	0
		0.13	0.01	0.02
		0.09	0.09	0.06
		0.13	0.07	0.01

## Sheet: C
Supplementary File 1C. Quantification of miRNA/* expression in catalytically-defective mutants
	Ler	Ler;35S-HA-RICE1 #7	Ler;35S-HA-RICE1 #24
miR158	1.00 ± 0.05	0.79 ± 0.03	0.80 ± 0.04
miR158*	1.00 ± 0.06	0.87 ± 0.06	0.73 ± 0.14
miR164	1.00 ± 0.03	0.60 ± 0.03	0.56 ± 0.05
miR164*	1.00 ± 0.05	0.60 ± 0.05	0.59 ± 0.02
miR166	1.00 ± 0.02	0.69 ± 0.03	0.62 ± 0.05
miR166abc*	1.00 ± 0.11	0.93 ± 0.02	0.65 ± 0.03
miR166e*	1.00 ± 0.07	0.69 ± 0.06	0.57 ± 0.08
p-value (Paired t-test)		0.0098	0.018
		0.022	0.041
		0.009	0.015
		0.015	0.007
		0.013	0.02
		0.073	0.03
		0.04	0.043

## Sheet: D
Supplementary File 1D. Expression pattern of miRNAs in wild type and 35S-HA-RICE1 D52A transgenic plants
Chr_ID	Start	End	Ath-miRNA_ID	Strand	WT_CPM_Mean	35S-HA-RICE1-D52A_CPM_Mean	Fold_Change	Direction
Chr2	11230573	11230597	ath-miR404	-	0	0.065222	7.5222	Up
Chr2	7878729	7878750	ath-miR397b	-	0	0.0435696	5.35696	Up
Chr5	16890465	16890486	ath-miR8171	+	0	0.0435696	5.35696	Up
Chr2	25137518	25137539	ath-miR414	-	0	0.032611	4.2611	Up
Chr5	16157837	16157857	ath-miR866-3p	-	188.755	772.069	4.09032	Up
Chr3	8392456	8392477	ath-miR5632-3p	-	0	0.0273421	3.73421	Up
Chr5	16157910	16157931	ath-miR866-5p	-	202.57	626.194	3.09125	Up
Chr5	4479447	4479469	ath-miR848	-	0.0979482	0.294185	2.81788	Up
Chr5	1340581	1340602	ath-miR826b	-	0.0417989	0.114481	2.40317	Up
Chr3	10356783	10356804	ath-miR5639-5p	+	0.0905303	0.190818	1.99759	Up
Chr5	6740568	6740590	ath-miR864-3p	+	4.43809	8.61806	1.94184	Up
Chr5	1340527	1340548	ath-miR826a	+	0.146053	0.288916	1.91547	Up
Chr1	2854310	2854331	ath-miR2111a-5p	+	0.0280747	0.0599531	1.83726	Up
Chr1	400401	400422	ath-miR2111b-5p	+	0.0280747	0.0599531	1.83726	Up
Chr3	24605526	24605547	ath-miR5014b	-	0.0761798	0.147092	1.82284	Up
Chr4	5500047	5500068	ath-miR782	+	0.0417989	0.0820264	1.77661	Up
Chr3	19544784	19544805	ath-miR5633	+	0.0835977	0.152517	1.73634	Up
Chr5	3740937	3740957	ath-miR8175	+	132.299	206.283	1.55917	Up
Chr3	5497069	5497090	ath-miR5023	-	0.709751	1.0465	1.46787	-
Chr5	2641476	2641497	ath-miR834	-	0.201091	0.29392	1.43976	-
Chr5	15891624	15891645	ath-miR869.1	-	0.209135	0.294341	1.38883	-
Chr4	17386812	17386833	ath-miR5664	+	0.0698735	0.097833	1.35005	-
Chr3	28889394	28889415	ath-miR4228-5p	+	0.0561493	0.0761806	1.30282	-
Chr3	7122565	7122586	ath-miR5631	-	0.446204	0.571877	1.27547	-
Chr5	5169997	5170018	ath-miR865-5p	+	159.274	193.921	1.21753	-
Chr5	6740502	6740523	ath-miR864-5p	+	7.98735	9.71391	1.21616	-
Chr3	6546768	6546789	ath-miR5028	-	3.1815	3.80092	1.19408	-
Chr2	9635000	9635024	ath-miR405a	-	0.0905303	0.108792	1.18165	-
Chr2	20632582	20632606	ath-miR405b	+	0.0905303	0.108792	1.18165	-
Chr2	2789669	2789693	ath-miR405d	-	0.0905303	0.108792	1.18165	-
Chr5	22122810	22122831	ath-miR827	-	194.027	228.22	1.17622	-
Chr4	9023267	9023288	ath-miR5641	+	0.110561	0.130865	1.16841	-
Chr2	10227164	10227185	ath-miR399a	+	13.4972	15.5265	1.15024	-
Chr2	14442987	14443008	ath-miR399d	-	13.4347	15.2923	1.13817	-
Chr2	14443581	14443602	ath-miR399e	+	13.4347	15.2923	1.13817	-
Chr2	14445083	14445104	ath-miR399f	+	13.4347	15.2923	1.13817	-
Chr1	3366348	3366368	ath-miR158a-3p	-	53804.7	60458.9	1.12367	-
Chr4	11786293	11786313	ath-miR5654-5p	+	7.9195	8.6373	1.09052	-
Chr5	13847019	13847041	ath-miR828	+	0.499504	0.54522	1.08973	-
Chr1	20772272	20772292	ath-miR158b	+	921.711	978.664	1.06179	-
Chr1	17589065	17589085	ath-miR156j	-	6.59352	6.8768	1.0429	-
Chr1	19807089	19807109	ath-miR156i	-	6.25379	6.5117	1.04118	-
Chr4	19659380	19659402	ath-miR771	-	0.0417989	0.0435696	1.03418	-
Chr1	7740609	7740630	ath-miR162b-3p	-	791.02	806.005	1.01894	-
Chr1	2634935	2634956	ath-miR162a-3p	-	792.182	807.035	1.01875	-
Chr1	6244672	6244693	ath-miR157c-5p	-	2663.2	2676.54	1.00501	-
Chr1	24913275	24913296	ath-miR157a-5p	-	2663.28	2676.54	1.00498	-
Chr1	24921103	24921124	ath-miR157b-5p	+	2663.28	2676.54	1.00498	-
Chr2	1046947	1046969	ath-miR2936	-	0	0	1	-
Chr2	22251826	22251847	ath-miR2938	-	0	0	1	-
Chr2	6217498	6217519	ath-miR3440b-5p	+	1	1	1	-
Chr2	29016585	29016607	ath-miR402	+	0	0	1	-
Chr2	23058038	23058059	ath-miR413	+	0	0	1	-
Chr3	13708766	13708787	ath-miR417	-	0	0	1	-
Chr3	6516264	6516285	ath-miR418	+	0	0	1	-
Chr3	15660372	15660393	ath-miR419	+	0	0	1	-
Chr3	25230643	25230664	ath-miR420	-	0	0	1	-
Chr3	22372689	22372710	ath-miR4227	+	0	0	1	-
Chr3	10711711	10711732	ath-miR4240	-	0	0	1	-
Chr3	22107358	22107379	ath-miR426	+	0	0	1	-
Chr3	7166867	7166888	ath-miR5013	+	0	0	1	-
Chr3	9920151	9920172	ath-miR5016	+	0	0	1	-
Chr3	24543960	24543984	ath-miR5018	-	0	0	1	-
Chr3	22372478	22372499	ath-miR5022	+	0	0	1	-
Chr3	16766284	16766305	ath-miR5024-3p	-	1	1	1	-
Chr3	16766387	16766409	ath-miR5024-5p	-	1	1	1	-
Chr3	17985880	17985901	ath-miR5628	+	0	0	1	-
Chr3	12011198	12011219	ath-miR5630a	-	0	0	1	-
Chr3	12023572	12023593	ath-miR5630b	-	0	0	1	-
Chr3	14100016	14100037	ath-miR5638b	+	0	0	1	-
Chr4	16649995	16650015	ath-miR5644	+	0	0	1	-
Chr4	18902622	18902643	ath-miR5655	+	0	0	1	-
Chr4	5292747	5292768	ath-miR5660	-	0	0	1	-
Chr4	10449330	10449351	ath-miR5661	+	0	0	1	-
Chr4	13050724	13050745	ath-miR773b-3p	-	0	0	1	-
Chr4	22150151	22150172	ath-miR774b-5p	+	0	0	1	-
Chr4	16588076	16588100	ath-miR8121	-	0	0	1	-
Chr5	7478571	7478592	ath-miR8173	-	0	0	1	-
Chr5	22678165	22678187	ath-miR8182	+	0	0	1	-
Chr5	3311973	3311994	ath-miR8184	-	0	0	1	-
Chr5	16072499	16072520	ath-miR849	-	0	0	1	-
Chr5	22577661	22577682	ath-miR846-3p	+	111.074	110.911	0.998534	-
Chr1	22537307	22537328	ath-miR1888b	+	0.144942	0.14198	0.980882	-
Chr1	15611872	15611893	ath-miR1886.1	+	0.985283	0.964892	0.979512	-
Chr5	771491	771513	ath-miR840-5p	-	19.2994	18.7293	0.970478	-
Chr5	11795198	11795219	ath-miR8176	+	0.0343809	0.032611	0.96012	-
Chr3	4770549	4770570	ath-miR5020c	+	0.437675	0.41936	0.959089	-
Chr3	1653538	1653559	ath-miR5640	-	4.88832	4.63239	0.947753	-
Chr5	28634	28655	ath-miR838	+	22.4654	21.2755	0.947058	-
Chr1	9872482	9872503	ath-miR169j	-	71.1829	67.1601	0.943494	-
Chr1	9878689	9878710	ath-miR169n	-	71.1829	67.1601	0.943494	-
Chr2	19319932	19319953	ath-miR408-3p	+	905.81	853.046	0.94175	-
Chr1	9876039	9876060	ath-miR169l	-	70.6279	66.3038	0.938785	-
Chr2	11785946	11785967	ath-miR400	+	355.921	330.472	0.928499	-
Chr3	21161608	21161629	ath-miR4245	+	0.341323	0.315837	0.927456	-
Chr5	17838153	17838174	ath-miR861-3p	-	441.454	408.395	0.925115	-
Chr3	10027009	10027030	ath-miR5595a	-	5.36979	4.96455	0.924674	-
Chr4	10026978	10026999	ath-miR5995b	+	5.36979	4.96455	0.924674	-
Chr1	15870867	15870888	ath-miR169c	-	171.874	158.155	0.920187	-
Chr4	18485508	18485529	ath-miR5658	-	0.084224	0.0761806	0.914635	-
Chr1	9872105	9872126	ath-miR169i	-	79.9254	73.0753	0.914304	-
Chr1	9875674	9875695	ath-miR169k	-	79.9254	73.0753	0.914304	-
Chr1	9878317	9878338	ath-miR169m	-	79.9254	73.0753	0.914304	-
Chr1	6695543	6695564	ath-miR169h	-	79.765	72.9227	0.91423	-
Chr1	4359181	4359202	ath-miR169a-5p	-	297.845	271.901	0.912899	-
Chr1	8527510	8527531	ath-miR169b-5p	+	297.845	271.901	0.912899	-
Chr5	14100078	14100099	ath-miR8170-3p	+	4.0104	3.63863	0.90753	-
Chr5	7885392	7885413	ath-miR841a-5p	-	9.44513	8.52768	0.902968	-
Chr1	23988565	23988586	ath-miR172e-3p	+	16.1836	14.5388	0.898425	-
Chr1	9136125	9136145	ath-miR156f-5p	+	2497.34	2243.42	0.898324	-
Chr1	3867212	3867232	ath-miR156e	+	2497.34	2243.39	0.898311	-
Chr1	15074944	15074964	ath-miR156b-5p	+	2501.88	2247.11	0.898169	-
Chr1	10676533	10676553	ath-miR156a-5p	-	2501.92	2247.14	0.898167	-
Chr1	15415490	15415510	ath-miR156c-5p	-	2501.92	2247.14	0.898167	-
Chr2	2179088	2179109	ath-miR3932a	+	1.4712	1.31777	0.896411	-
Chr2	9364539	9364560	ath-miR395b	+	38.5592	33.6155	0.871822	-
Chr2	9367148	9367169	ath-miR395c	+	38.5592	33.6155	0.871822	-
Chr2	26273938	26273959	ath-miR395f	+	38.5592	33.6155	0.871822	-
Chr2	9363205	9363226	ath-miR395a	-	38.6217	33.6429	0.871121	-
Chr2	26269988	26270009	ath-miR395d	-	38.6217	33.6429	0.871121	-
Chr2	26272785	26272806	ath-miR395e	-	38.6297	33.6429	0.870939	-
Chr5	11159773	11159794	ath-miR825	+	69.1982	59.4697	0.859432	-
Chr1	17825730	17825751	ath-miR161.1	+	3098.86	2645.42	0.853675	-
Chr3	7844611	7844632	ath-miR5026	+	276.838	235.866	0.852008	-
Chr1	20039555	20039576	ath-miR169d	-	13.8645	11.7796	0.849732	-
Chr1	20041585	20041606	ath-miR169e	+	13.8645	11.7796	0.849732	-
Chr1	4805798	4805819	ath-miR169f-5p	-	13.8645	11.7796	0.849732	-
Chr5	10634330	10634354	ath-miR836	-	0.0343809	0.0273421	0.8414	-
Chr1	15611881	15611902	ath-miR1886.2	+	9.93779	8.31959	0.837331	-
Chr4	3247261	3247282	ath-miR5998a	+	5.76116	4.821	0.837093	-
Chr4	3247377	3247398	ath-miR5998b	-	5.76116	4.821	0.837093	-
Chr5	11834152	11834173	ath-miR829-5p	-	0.334532	0.277801	0.835339	-
Chr1	3456712	3456732	ath-miR156d-5p	-	3468.68	2892.76	0.833969	-
Chr1	18026988	18027008	ath-miR157d	-	143.625	119.479	0.831892	-
Chr1	8412588	8412608	ath-miR156g	-	5.4048	4.48993	0.831043	-
Chr1	11483093	11483114	ath-miR169g-5p	-	12.4543	10.3242	0.829102	-
Chr5	15891613	15891634	ath-miR869.2	-	3.70817	3.07176	0.828838	-
Chr5	7845755	7845777	ath-miR850	+	57.0497	47.2439	0.828149	-
Chr2	24293159	24293180	ath-miR391-5p	+	108.354	89.1766	0.823029	-
Chr4	22084309	22084330	ath-miR5647	-	0.0417989	0.032611	0.822624	-
Chr3	6787107	6787128	ath-miR5020b	-	0.354562	0.28876	0.819502	-
Chr5	9942260	9942281	ath-miR844-5p	-	32.8156	26.7536	0.815329	-
Chr2	23345386	23345407	ath-miR399b	-	36.902	29.979	0.812444	-
Chr3	1523444	1523465	ath-miR447c-5p	-	0.660534	0.533997	0.811289	-
Chr4	29422545	29422565	ath-miR775	+	345.673	280.106	0.810326	-
Chr3	15336776	15336797	ath-miR5638a	-	0.0561493	0.0435696	0.809828	-
Chr4	1727350	1727371	ath-miR5656	+	0.811641	0.653903	0.808021	-
Chr2	7583131	7583151	ath-miR3434-3p	-	188.201	151.969	0.807483	-
Chr2	24962567	24962588	ath-miR399c-3p	+	38.2151	30.8511	0.807354	-
Chr2	5500122	5500143	ath-miR2934-5p	-	346.683	278.284	0.802703	-
Chr1	11137555	11137577	ath-miR167d	+	6876.84	5514.45	0.801887	-
Chr1	17825721	17825742	ath-miR161.2	+	2631.78	2103.99	0.799455	-
Chr1	8236160	8236182	ath-miR173-5p	+	600.941	478.516	0.796282	-
Chr2	7890694	7890715	ath-miR3932b-5p	-	7.03481	5.57525	0.792817	-
Chr1	8108089	8108110	ath-miR167a-5p	+	7411.35	5854.42	0.789926	-
Chr1	23406176	23406197	ath-miR167b	+	7409.68	5852.86	0.789895	-
Chr5	22577193	22577214	ath-miR842	+	35.3624	27.7293	0.784206	-
Chr4	7882847	7882869	ath-miR5996	-	5.23934	4.06582	0.776444	-
Chr1	1306749	1306770	ath-miR167c-5p	-	14.5308	11.2794	0.776395	-
Chr4	7400951	7400972	ath-miR5999	-	0.825991	0.637099	0.77405	-
Chr4	9560865	9560886	ath-miR779.2	+	56.7032	43.4143	0.765683	-
Chr1	19073520	19073541	ath-miR171a-3p	+	560.419	428.049	0.763806	-
Chr2	1041011	1041032	ath-miR398a-3p	+	331.849	253.37	0.763519	-
Chr2	4691106	4691127	ath-miR398b-3p	+	330.641	252.337	0.763181	-
Chr2	4694777	4694798	ath-miR398c-3p	+	330.641	252.337	0.763181	-
Chr1	27713233	27713254	ath-miR159a	-	12355.4	9427.57	0.763035	-
Chr1	6220812	6220833	ath-miR159b-3p	+	12355.4	9427.57	0.763035	-
Chr1	18994825	18994846	ath-miR159c	+	12344	9417.05	0.762886	-
Chr4	23413401	23413422	ath-miR5652	-	1.51523	1.13886	0.753238	-
Chr4	14197115	14197135	ath-miR5642a	+	13.422	10.0586	0.749601	-
Chr4	3144	3164	ath-miR5642b	+	13.422	10.0586	0.749601	-
Chr1	10578651	10578672	ath-miR168a-5p	+	1292.81	965.885	0.747124	-
Chr1	18358872	18358893	ath-miR168b-5p	-	1292.81	965.885	0.747124	-
Chr3	8460535	8460557	ath-miR4221	+	0.61922	0.45766	0.743238	-
Chr2	23636960	23636981	ath-miR390b-5p	+	4114.75	3051.58	0.74162	-
Chr2	16061970	16061991	ath-miR390a-5p	+	4115.1	3051.75	0.741599	-
Chr5	21395544	21395565	ath-miR870-3p	-	0.395249	0.288651	0.736956	-
Chr4	26638082	26638104	ath-miR777	+	4.76886	3.51101	0.736789	-
Chr1	9888985	9889006	ath-miR160b	+	28.7423	21.0942	0.733999	-
Chr5	10718105	10718126	ath-miR862-5p	+	434.392	317.648	0.731247	-
Chr2	19415153	19415174	ath-miR403-3p	+	4245.27	3096.9	0.729496	-
Chr1	26411593	26411614	ath-miR170-3p	-	62.9063	45.8605	0.729072	-
Chr5	4496825	4496846	ath-miR823	-	330.334	240.283	0.727401	-
Chr5	7878197	7878218	ath-miR857	-	17.464	12.4552	0.713357	-
Chr1	19009157	19009178	ath-miR160c-5p	-	67.0027	47.108	0.70312	-
Chr1	16340281	16340302	ath-miR160a-5p	+	67.0308	47.108	0.702826	-
Chr3	4182142	4182164	ath-miR472-3p	-	44.5269	31.2472	0.701826	-
Chr4	14742775	14742796	ath-miR5645c	+	3.19391	2.22182	0.696592	-
Chr4	17349547	17349568	ath-miR778	-	1.64048	1.13817	0.695659	-
Chr5	7102571	7102592	ath-miR8172	-	0.596967	0.408822	0.690025	-
Chr4	9560901	9560922	ath-miR779.1	+	9.77492	6.69683	0.685426	-
Chr5	9098875	9098896	ath-miR860	+	9.7146	6.65332	0.685203	-
Chr1	24884358	24884382	ath-miR163	+	942.886	645.831	0.684955	-
Chr1	22930094	22930115	ath-miR171c-3p	-	195.86	134.109	0.684736	-
Chr1	3961366	3961387	ath-miR171b-3p	-	195.86	134.077	0.684569	-
Chr5	4820472	4820494	ath-miR830-5p	-	17.1756	11.6216	0.676823	-
Chr1	20587990	20588011	ath-miR172d-3p	+	4074.69	2741.35	0.672776	-
Chr1	3599790	3599811	ath-miR172c	-	4074.81	2741.37	0.672762	-
Chr1	11942917	11942938	ath-miR172a	-	4074.87	2741.41	0.672759	-
Chr1	1188210	1188231	ath-miR172b-3p	-	4074.85	2741.37	0.672756	-
Chr5	8336301	8336322	ath-miR852	+	10.2144	6.79577	0.665642	Down
Chr2	16652110	16652132	ath-miR393a-5p	+	263.954	175.541	0.665057	Down
Chr2	20691656	20691678	ath-miR393b-5p	+	263.954	175.541	0.665057	Down
Chr2	19430150	19430171	ath-miR406	-	4.36163	2.87546	0.660042	Down
Chr3	1528147	1528168	ath-miR447a.2-3p	-	185.012	121.651	0.657549	Down
Chr4	21360222	21360243	ath-miR5649a	+	0.312763	0.201933	0.656619	Down
Chr4	21360158	21360179	ath-miR5649b	-	0.312763	0.201933	0.656619	Down
Chr5	12625127	12625148	ath-miR824-5p	+	334.991	219.648	0.655693	Down
Chr4	16409803	16409826	ath-miR5659	-	1.11478	0.724503	0.653018	Down
Chr4	13067312	13067333	ath-miR773a	+	65.7161	42.7197	0.650117	Down
Chr1	19176240	19176261	ath-miR166a-3p	+	15636.2	10156	0.649519	Down
Chr1	17516377	17516398	ath-miR166f	+	15158	9841.63	0.64927	Down
Chr1	16775523	16775544	ath-miR166e-3p	-	15159.2	9842.32	0.649264	Down
Chr1	22922300	22922321	ath-miR166b-3p	+	15158.7	9841.95	0.649263	Down
Chr1	369855	369876	ath-miR165b	-	15136.2	9826.47	0.649202	Down
Chr1	2838736	2838757	ath-miR166c	+	15170.1	9847.77	0.649158	Down
Chr1	2840707	2840728	ath-miR166d	+	15170.1	9847.77	0.649158	Down
Chr1	25504881	25504902	ath-miR166g	+	15170.1	9847.77	0.649158	Down
Chr1	78931	78952	ath-miR165a-3p	-	15148.4	9832.59	0.649083	Down
Chr5	16589430	16589451	ath-miR8174	-	16.924	10.9685	0.648311	Down
Chr1	15611952	15611973	ath-miR1886.3	+	5.5492	3.59115	0.647783	Down
Chr4	18686941	18686962	ath-miR5663-5p	-	13.819	8.91636	0.645483	Down
Chr5	7846834	7846855	ath-miR863-3p	+	2231.55	1439.55	0.64509	Down
Chr2	6217558	6217579	ath-miR3440b-3p	+	154.526	99.6232	0.644704	Down
Chr2	4142442	4142463	ath-miR396a-5p	-	17064.9	10941.8	0.641188	Down
Chr2	13611807	13611828	ath-miR396b-5p	+	17039.7	10925.4	0.641174	Down
Chr5	29525264	29525286	ath-miR833a-3p	+	614.001	390.124	0.63538	Down
Chr3	1528189	1528211	ath-miR447a-3p	-	34.153	21.5787	0.631933	Down
Chr3	1535481	1535503	ath-miR447b	-	34.153	21.5787	0.631933	Down
Chr5	28544783	28544804	ath-miR835-5p	-	223.969	141.006	0.629579	Down
Chr5	4674432	4674454	ath-miR855	+	1.69629	1.06199	0.62826	Down
Chr1	19520769	19520790	ath-miR164a	+	244.613	152.213	0.622276	Down
Chr1	287585	287606	ath-miR164b-5p	+	244.516	152.115	0.622122	Down
Chr1	9852683	9852704	ath-miR164c-5p	+	244.516	152.115	0.622122	Down
Chr5	18087284	18087305	ath-miR8178	+	0.0761798	0.0435696	0.621603	Down
Chr5	2165674	2165695	ath-miR847	+	56.1149	34.7773	0.619819	Down
Chr5	7161929	7161950	ath-miR8179	-	6.05403	3.73857	0.618164	Down
Chr5	10247389	10247411	ath-miR831-3p	+	1.7446	1.0729	0.617181	Down
Chr2	7058206	7058226	ath-miR394a	+	2157.32	1324.99	0.614187	Down
Chr2	28568820	28568840	ath-miR394b-5p	+	2157.6	1325.16	0.614184	Down
Chr5	11747798	11747819	ath-miR8183	-	78.6208	48.1306	0.612236	Down
Chr3	12270340	12270361	ath-miR5637	-	7.71669	4.71805	0.611912	Down
Chr3	10403334	10403355	ath-miR5019	+	0.390055	0.234231	0.610495	Down
Chr5	5080689	5080710	ath-miR8168	+	3.26766	1.98863	0.609773	Down
Chr5	897286	897307	ath-miR822-5p	-	460.055	279.076	0.606621	Down
Chr5	29525263	29525284	ath-miR833b	-	1.0878	0.648478	0.599816	Down
Chr4	10706867	10706888	ath-miR5997	+	5.62911	3.3613	0.597842	Down
Chr5	6413058	6413079	ath-miR832-5p	+	52.9534	31.5143	0.595133	Down
Chr4	7423522	7423543	ath-miR781a	+	8.85928	5.25436	0.593549	Down
Chr5	11847720	11847741	ath-miR854a	+	0.0624556	0.032611	0.588098	Down
Chr5	11324567	11324588	ath-miR854b	-	0.0624556	0.032611	0.588098	Down
Chr5	11838097	11838118	ath-miR854c	+	0.0624556	0.032611	0.588098	Down
Chr5	11690058	11690079	ath-miR854d	-	0.0624556	0.032611	0.588098	Down
Chr5	11942468	11942489	ath-miR854e	+	0.0624556	0.032611	0.588098	Down
Chr3	3802932	3802954	ath-miR5629	+	0.59066	0.343179	0.587985	Down
Chr3	27987017	27987038	ath-miR415	+	0.202203	0.114481	0.586615	Down
Chr5	22149734	22149755	ath-miR859	+	6.51287	3.79679	0.583607	Down
Chr1	22597086	22597106	ath-miR156h	-	23.739	13.7788	0.580605	Down
Chr5	26772906	26772927	ath-miR858b	+	47.033	27.0378	0.57496	Down
Chr4	22150004	22150025	ath-miR774a	+	19.1965	11.0221	0.574396	Down
Chr5	8346415	8346437	ath-miR853	+	6.88538	3.9346	0.572063	Down
Chr4	7423584	7423605	ath-miR781b	-	8.69257	4.96002	0.571098	Down
Chr4	4525315	4525337	ath-miR8166	-	13.1684	7.41971	0.563781	Down
Chr2	17029869	17029890	ath-miR319c	+	4727.59	2659.31	0.56251	Down
Chr2	16660468	16660489	ath-miR319b	-	4894.8	2748.08	0.561429	Down
Chr5	5170096	5170117	ath-miR865-3p	+	233.659	131.18	0.56142	Down
Chr2	12353108	12353129	ath-miR319a	+	5018.47	2796.97	0.557335	Down
Chr3	8432746	8432767	ath-miR5012	+	17.6275	9.77098	0.554556	Down
Chr4	16538509	16538530	ath-miR8165	-	11.8791	6.51948	0.549201	Down
Chr4	8894984	8895006	ath-miR8167a	+	2.73267	1.48208	0.544027	Down
Chr4	17469945	17469967	ath-miR8167b	-	2.73267	1.48208	0.544027	Down
Chr4	18843648	18843670	ath-miR8167c	-	2.73267	1.48208	0.544027	Down
Chr4	7057209	7057231	ath-miR8167d	+	2.73267	1.48208	0.544027	Down
Chr4	23431702	23431724	ath-miR8167e	-	2.73267	1.48208	0.544027	Down
Chr5	24002238	24002260	ath-miR8167f	-	2.73267	1.48208	0.544027	Down
Chr5	26773694	26773715	ath-miR858a	-	118.633	63.6661	0.536703	Down
Chr3	20622561	20622582	ath-miR5635b	-	4.71188	2.49571	0.530658	Down
Chr3	13316773	13316794	ath-miR5635c	-	4.71188	2.49571	0.530658	Down
Chr3	1024076	1024097	ath-miR5635d	+	4.71188	2.49571	0.530658	Down
Chr2	2625959	2625980	ath-miR397a	+	143.705	75.7687	0.527284	Down
Chr4	3517382	3517402	ath-miR5646	-	3.03627	1.59088	0.52552	Down
Chr5	6521052	6521073	ath-miR837-3p	+	508.694	265.791	0.522498	Down
Chr2	15758110	15758131	ath-miR3933	+	0.564809	0.283647	0.51086	Down
Chr5	7846643	7846664	ath-miR863-5p	+	1591.46	810.83	0.509487	Down
Chr4	16798850	16798870	ath-miR5662	+	12.5645	6.36999	0.507376	Down
Chr4	19499092	19499113	ath-miR5665	-	1.58005	0.795571	0.506633	Down
Chr5	2184324	2184345	ath-miR841b-5p	+	0.571742	0.283226	0.504048	Down
Chr2	11901466	11901488	ath-miR2933a	+	6.36675	3.1946	0.502544	Down
Chr2	17402793	17402815	ath-miR2933b	-	6.36675	3.1946	0.502544	Down
Chr2	7583304	7583324	ath-miR3434-5p	-	0.790499	0.392174	0.502404	Down
Chr3	6926271	6926292	ath-miR5635a	+	4.61505	2.30531	0.500602	Down
Chr5	12214085	12214107	ath-miR845b	-	0.632945	0.305299	0.490399	Down
Chr3	18549962	18549983	ath-miR5636	+	1.01287	0.485159	0.484086	Down
Chr5	9362633	9362655	ath-miR8177	-	8.05617	3.88456	0.482826	Down
Chr4	19026914	19026938	ath-miR5653	-	39.0317	18.6706	0.47848	Down
Chr5	8836358	8836379	ath-miR8169	+	0.31054	0.141403	0.472336	Down
Chr4	9789641	9789662	ath-miR5657	+	0.473652	0.218004	0.471421	Down
Chr5	11834093	11834117	ath-miR829-3p.1	-	2.70223	1.25876	0.467794	Down
Chr3	12268543	12268564	ath-miR5029	+	0.15236	0.065222	0.463305	Down
Chr5	19659645	19659666	ath-miR851-5p	-	668.782	307.735	0.460142	Down
Chr4	5321254	5321274	ath-miR5645e	+	2.95031	1.33484	0.454289	Down
Chr3	6791400	6791421	ath-miR5020a	-	0.307083	0.130709	0.443759	Down
Chr4	17418819	17418839	ath-miR5645a	+	3.37475	1.48735	0.442383	Down
Chr4	4889486	4889506	ath-miR5645b	+	3.37475	1.48735	0.442383	Down
Chr4	16116607	16116627	ath-miR5645d	+	3.37475	1.48735	0.442383	Down
Chr4	14947079	14947099	ath-miR5645f	-	3.37475	1.48735	0.442383	Down
Chr5	25279137	25279158	ath-miR839-5p	-	359.65	156.093	0.434029	Down
Chr4	11757141	11757162	ath-miR5643b	-	12.5423	5.38861	0.430087	Down
Chr2	5020358	5020379	ath-miR401	-	0.672035	0.278113	0.422432	Down
Chr5	2063979	2063998	ath-miR8180	+	6.6584	2.7732	0.417371	Down
Chr5	29525203	29525225	ath-miR833a-5p	+	838.35	348.046	0.415156	Down
Chr3	11974821	11974841	ath-miR5021	-	0.888588	0.359827	0.411565	Down
Chr3	7008575	7008596	ath-miR416	+	0.0979482	0.032611	0.394736	Down
Chr4	12035114	12035135	ath-miR5666	+	0.450772	0.158207	0.365054	Down
Chr1	7168878	7168899	ath-miR1888a	+	0.0979482	0.0273421	0.345926	Down
Chr3	24553929	24553950	ath-miR5014a-5p	+	33.0181	11.3523	0.343819	Down
Chr3	11963004	11963025	ath-miR5017-5p	-	96.9918	31.4987	0.324756	Down
Chr5	6413274	6413295	ath-miR832-3p	+	71.8013	22.247	0.309842	Down
Chr2	13866275	13866296	ath-miR407	+	0.174128	0.0435696	0.290937	Down
Chr4	8504144	8504165	ath-miR780.2	-	267.006	77.5909	0.290623	Down
Chr4	11667856	11667877	ath-miR5643a	+	2.85273	0.806841	0.285337	Down
Chr4	11499533	11499555	ath-miR5648-5p	+	0.0280747	0	0.262642	Down
Chr5	12217456	12217477	ath-miR845a	-	0.194785	0.0435696	0.26159	Down
Chr4	8504165	8504186	ath-miR780.1	-	47.4905	12.4114	0.261501	Down
Chr4	22795698	22795719	ath-miR776	+	4.40151	1.09498	0.250476	Down
Chr4	17178488	17178509	ath-miR5651	+	0.540817	0.125596	0.246172	Down
Chr3	20554974	20554995	ath-miR5015	-	0.0343809	0	0.225322	Down
Chr5	11375386	11375407	ath-miR867	+	1.96129	0.430583	0.2235	Down
Chr5	11834072	11834093	ath-miR829-3p.2	-	0.382011	0.0709117	0.206402	Down
Chr4	19686958	19686979	ath-miR5650	+	0.251419	0.0435696	0.204918	Down
Chr5	11957486	11957508	ath-miR856	+	5.89517	1.15039	0.196505	Down
Chr2	13622668	13622689	ath-miR2937	+	0.0417989	0	0.193054	Down
Chr3	16993912	16993933	ath-miR5025	+	0.0417989	0	0.193054	Down
Chr5	6488286	6488307	ath-miR868-5p	+	0.890185	0.16332	0.192538	Down
Chr3	10943922	10943943	ath-miR5027	+	0.0561493	0	0.151173	Down
Chr3	14982321	14982342	ath-miR5634	+	0.42963	0.0435696	0.121851	Down
Chr3	11368771	11368792	ath-miR4239	+	0.500615	0.0435696	0.104912	Down
Chr4	11499746	11499767	ath-miR5648-3p	+	0.0968365	0	0.093601	Down
Chr5	21641288	21641308	ath-miR8181	-	0.0979482	0	0.092637	Down
Chr5	17742146	17742167	ath-miR843	+	739.079	49.4222	0.0668827	Down
Chr1	11370300	11370321	ath-miR1887	+	0.153471	0	0.0611728	Down
Chr3	19567226	19567247	ath-miR4243	+	0.174128	0	0.0543101	Down
Chr2	19567037	19567058	ath-miR2939	+	0.431854	0	0.0226319	Down

## Sheet: E
Supplementary File 1E. Expression pattern of miRNA star in wild type and 35S-HA-RICE1 D52A transgenic plants
Chr_ID	Start	End	Ath-miRNA_ID	Strand	WT_CPM_Mean	35S-HA-RICE1-D52A_CPM_Mean	Fold_Change	Direction
Chr5	16157837	16157857	ath-miR866-3p (ath-miR866-5p*)	-	188.755	772.069	4.09032	Up
Chr3	24554010	24554031	ath-miR5014a-3p (ath-miR5014-5p*)	+	1	3.73421	3.73421	Up
Chr5	16157910	16157931	ath-miR866-5p (ath-miR866-3p*)	-	202.57	626.194	3.09125	Up
Chr5	6740568	6740590	ath-miR864-3p (ath-miR864-5p*)	+	4.43809	8.61806	1.94184	Up
Chr5	28544470	28544491	ath-miR835-3p (ath-miR835-5p*)	-	12.1672	21.7045	1.78385	Up
Chr5	19659576	19659597	ath-miR851-3p (ath-miR851-5p*)	-	17.7822	27.6842	1.55685	Up
Chr2	24293210	24293231	ath-miR391-3p (ath-miR391*)	+	7421.8	11389.3	1.53457	Up
Chr1	24913204	24913225	ath-miR157a-3p (ath-miR157a*)	-	48236.3	72957.4	1.5125	Up
Chr1	24921174	24921195	ath-miR157b-3p (ath-miR157b*)	+	48236.3	72957.4	1.5125	Up
Chr5	17838222	17838243	ath-miR861-5p (ath-miR861-3p*)	-	26.0308	38.0521	1.46181	-
Chr4	11786347	11786370	ath-miR5654-3p (ath-miR5654*)	+	1254.3	1586.63	1.26495	-
Chr1	15075003	15075026	ath-miR156b-3p (ath-miR156b*)	+	12845.5	15807.4	1.23058	-
Chr5	5169997	5170018	ath-miR865-5p (ath-miR865-3p*)	+	159.274	193.921	1.21753	-
Chr5	6740502	6740523	ath-miR864-5p (ath-miR864-3p*)	+	7.98735	9.71391	1.21616	-
Chr5	10718169	10718190	ath-miR862-3p (ath-miR862-5p*)	+	14.2329	16.2361	1.14074	-
Chr2	5500042	5500063	ath-miR2934-3p (ath-miR2934-5p*)	-	1	1	1	-
Chr2	6217498	6217519	ath-miR3440b-5p (ath-miR3440b-3p*)	+	1	1	1	-
Chr3	1523361	1523383	ath-miR447c-3p (ath-miR447c-5p*)	-	0	0	1	-
Chr3	16766284	16766305	ath-miR5024-3p (ath-miR5024-5p*)	-	1	1	1	-
Chr3	16766387	16766409	ath-miR5024-5p (ath-miR5024-3p*)	-	1	1	1	-
Chr2	19319865	19319886	ath-miR408-5p (ath-miR408*)	+	7108.07	7074.99	0.995345	-
Chr3	28889480	28889501	ath-miR4228-3p (ath-miR4228*)	+	127.207	121.366	0.954083	-
Chr5	21395603	21395624	ath-miR870-5p (ath-miR870*)	-	239.538	227.67	0.950453	-
Chr2	24962496	24962517	ath-miR399c-5p (ath-miR399c*)	+	168.104	155.684	0.926115	-
Chr3	4182265	4182286	ath-miR472-5p (ath-miR472*)	-	1453.52	1325.71	0.912069	-
Chr2	20691777	20691798	ath-miR393b-3p (ath-miR393b*)	+	25182.1	22823	0.906317	-
Chr2	1040947	1040968	ath-miR398a-5p (ath-miR398a*)	+	5234.93	4737.94	0.905063	-
Chr2	7890589	7890610	ath-miR3932b-3p (ath-miR3932b-5p*)	-	1.4712	1.31777	0.896411	-
Chr1	8236226	8236247	ath-miR173-3p (ath-miR173*)	+	3090.23	2750.53	0.890073	-
Chr1	4359010	4359030	ath-miR169a-3p (ath-miR169a*)	-	29548.3	26260	0.888715	-
Chr1	10676469	10676491	ath-miR156a-3p (ath-miR156a*)	-	911.444	801.944	0.879861	-
Chr1	18358802	18358823	ath-miR168b-3p (ath-miR168b*)	-	9680.65	8469.02	0.87484	-
Chr1	3366390	3366411	ath-miR158a-5p (ath-miR158a*)	-	10221	8916.97	0.872416	-
Chr1	2634997	2635019	ath-miR162a-5p (ath-miR162a*)	-	2651.38	2306.53	0.869935	-
Chr1	7740674	7740696	ath-miR162b-5p (ath-miR162b*)	-	2651.38	2306.53	0.869935	-
Chr1	400463	400484	ath-miR2111b-3p (ath-miR2111b*)	+	47.5608	41.3132	0.86864	-
Chr4	13050783	13050803	ath-miR773b-5p (ath-miR773b*)	-	68.537	58.7567	0.857299	-
Chr1	6220649	6220670	ath-miR159b-5p (ath-miR159b*)	+	5013	4272.7	0.852324	-
Chr1	6244526	6244547	ath-miR157c-3p (ath-miR157c*)	-	86490.9	73452.3	0.849249	-
Chr1	10578736	10578757	ath-miR168a-3p (ath-miR168a*)	+	40715.6	34377	0.844321	-
Chr5	22577425	22577446	ath-miR846-5p (ath-miR846*)	+	1057.49	867.266	0.820116	-
Chr1	15415425	15415447	ath-miR156c-3p (ath-miR156c*)	-	8454.41	6901.35	0.816301	-
Chr2	7583131	7583151	ath-miR3434-3p (ath-miR3434*)	-	188.201	151.969	0.807483	-
Chr5	2184419	2184440	ath-miR841b-3p (ath-miR841b*)	+	595.103	479.749	0.806161	-
Chr1	16775635	16775656	ath-miR166e-5p (ath-miR166e*)	-	2507.36	2016.18	0.804104	-
Chr2	5500122	5500143	ath-miR2934-5p (ath-miR2934-3p*)	-	346.683	278.284	0.802703	-
Chr5	14100019	14100040	ath-miR8170-5p (ath-miR8170-3p*)	+	0.410712	0.326952	0.800909	-
Chr2	16652204	16652225	ath-miR393a-3p (ath-miR393a*)	+	2049.19	1635.26	0.798002	-
Chr4	18686858	18686879	ath-miR5663-3p (ath-miR5663*)	-	3041.16	2408.95	0.792116	-
Chr2	19415076	19415098	ath-miR403-5p (ath-miR403*)	+	23432	18525.5	0.790607	-
Chr1	22930156	22930177	ath-miR171c-5p (ath-miR171c*)	-	12452.4	9814.21	0.788139	-
Chr5	771384	771405	ath-miR840-3p (ath-miR840*)	-	8196.42	6376.65	0.77798	-
Chr5	7885295	7885316	ath-miR841a-3p (ath-miR841*)	-	2208.78	1715.87	0.776839	-
Chr1	8108171	8108192	ath-miR167a-3p (ath-miR167a*)	+	106857	82341.9	0.77058	-
Chr2	4691032	4691053	ath-miR398b-5p (ath-miR398b*)	+	14532	10817.4	0.744387	-
Chr2	4694704	4694725	ath-miR398c-5p (ath-miR398c*)	+	14532	10817.4	0.744387	-
Chr1	1306629	1306652	ath-miR167c-3p (ath-miR167c*)	-	220.33	157.796	0.716179	-
Chr1	26411634	26411655	ath-miR170-5p (ath-miR170*)	-	9056.17	6478.27	0.715343	-
Chr1	19073451	19073472	ath-miR171a-5p (ath-miR171a*)	+	9056.17	6478.27	0.715343	-
Chr5	9942201	9942222	ath-miR844-3p (ath-miR844*)	-	3248.99	2320.17	0.71412	-
Chr2	23637033	23637053	ath-miR390b-3p (ath-miR390b*)	+	11737.6	8209.42	0.699415	-
Chr2	16062022	16062043	ath-miR390a-3p (ath-miR390a*)	+	11301.6	7884.17	0.697615	-
Chr1	4805712	4805733	ath-miR169f-3p (ath-miR169f*)	-	7002.47	4834.71	0.69043	-
Chr5	12625720	12625741	ath-miR824-3p (ath-miR824*)	+	33617.3	22968.1	0.683223	-
Chr1	79009	79030	ath-miR165a-5p (ath-miR165a*)	-	6966.85	4722.41	0.677841	-
Chr1	8527591	8527613	ath-miR169b-3p (ath-miR169b*)	+	3173.36	2146.8	0.676507	-
Chr4	22150223	22150244	ath-miR774b-3p (ath-miR774b*)	+	18.4128	12.4481	0.676058	-
Chr2	28568896	28568917	ath-miR394b-3p (ath-miR394b*)	+	294.901	198.178	0.672014	-
Chr1	19009094	19009115	ath-miR160c-3p (ath-miR160c*)	-	9685.64	6366.42	0.657305	Down
Chr2	234016	234037	ath-miR2112-3p (ath-miR2112-5p*)	-	2327.5	1501.69	0.645195	Down
Chr5	7846834	7846855	ath-miR863-3p (ath-miR863-5p*)	+	2231.55	1439.55	0.64509	Down
Chr2	6217558	6217579	ath-miR3440b-3p (ath-miR3440b-5p*)	+	154.526	99.6232	0.644704	Down
Chr1	3456642	3456665	ath-miR156d-3p (ath-miR156d*)	-	30689.6	19623.1	0.639408	Down
Chr1	19176127	19176148	ath-miR166a-5p (ath-miR166a*)	+	7878.18	5023.74	0.637677	Down
Chr1	22922211	22922232	ath-miR166b-5p (ath-miR166b*)	+	7878.18	5023.74	0.637677	Down
Chr1	16340341	16340362	ath-miR160a-3p (ath-miR160a*)	+	117.461	74.635	0.635405	Down
Chr5	29525264	29525286	ath-miR833a-3p (ath-miR833-5p*)	+	614.001	390.124	0.63538	Down
Chr5	4820405	4820426	ath-miR830-3p (ath-miR830-5p*)	-	7.89755	4.94575	0.626712	Down
Chr2	234125	234146	ath-miR2112-5p (ath-miR2112-3p*)	-	243.641	146.443	0.60106	Down
Chr5	6413058	6413079	ath-miR832-5p (ath-miR832-3p*)	+	52.9534	31.5143	0.595133	Down
Chr1	23988483	23988503	ath-miR172e-5p (ath-miR172e*)	+	4273.95	2414.24	0.564873	Down
Chr1	1188277	1188297	ath-miR172b-5p (ath-miR172b*)	-	4293.48	2420.23	0.5637	Down
Chr5	5170096	5170117	ath-miR865-3p (ath-miR865-5p*)	+	233.659	131.18	0.56142	Down
Chr5	897066	897087	ath-miR822-3p (ath-miR822*)	-	2469.2	1370.69	0.555115	Down
Chr2	13611903	13611924	ath-miR396b-3p (ath-miR396b*)	+	11632.7	6248.12	0.537114	Down
Chr2	4142330	4142351	ath-miR396a-3p (ath-miR396a*)	-	39747	21338.9	0.536868	Down
Chr5	7846643	7846664	ath-miR863-5p (ath-miR863-3p*)	+	1591.46	810.83	0.509487	Down
Chr1	287715	287736	ath-miR164b-3p (ath-miR164b*)	+	3658.89	1824.69	0.4987	Down
Chr1	3961429	3961450	ath-miR171b-5p (ath-miR171b*)	-	5393.95	2636.02	0.488699	Down
Chr1	9852746	9852767	ath-miR164c-3p (ath-miR164c*)	+	1746.05	803.887	0.460403	Down
Chr1	11483033	11483054	ath-miR169g-3p (ath-miR169g*)	-	51.2353	22.2735	0.434729	Down
Chr1	9136196	9136217	ath-miR156f-3p (ath-miR156f*)	+	426.962	183.579	0.429967	Down
Chr5	10247258	10247280	ath-miR831-5p (ath-miR831*)	+	39.8943	16.8051	0.42124	Down
Chr5	29525203	29525225	ath-miR833a-5p (ath-miR833-3p*)	+	838.35	348.046	0.415156	Down
Chr3	8392587	8392608	ath-miR5632-5p (ath-miR5632*)	-	38.5219	15.1403	0.39303	Down
Chr1	2854393	2854414	ath-miR2111a-3p (ath-miR2111a*)	+	194.384	65.3053	0.33596	Down
Chr3	11963004	11963025	ath-miR5017-5p (ath-miR5017*)	-	96.9918	31.4987	0.324756	Down
Chr5	6413274	6413295	ath-miR832-3p (ath-miR832-5p*)	+	71.8013	22.247	0.309842	Down
Chr1	20587920	20587941	ath-miR172d-5p (ath-miR172d*)	+	2090.62	601.487	0.287707	Down
Chr5	6520994	6521015	ath-miR837-5p (ath-miR837-3p*)	+	37.9398	10.7833	0.284221	Down
Chr5	6488398	6488419	ath-miR868-3p (ath-miR868-5p*)	+	0.0280747	0	0.262642	Down
Chr3	11962959	11962980	ath-miR5017-3p (ath-miR5017-5p*)	-	1.71763	0.310412	0.185463	Down
Chr3	10357136	10357160	ath-miR5639-3p (ath-miR5639*)	+	7.24556	1	0.138016	Down

## Sheet: F
Supplementary File 1F. Ratio of miRNA/miRNA* in wild type and 35S-HA-RICE1 D52A transgenic plants
Ath-miRNA/miRNA*_ID	Strand	miRNA/miRNA* ratio in Wild Type (WT)	miRNA/miRNA* Ratio in 35S-HA-RICE1 D52A (D5SA)	miRNA/miRNA* ratio in WT_vs_D52A
ath-miR156a/ath-miR156a*	-	8.10067	8.13038	-0.0297075
ath-miR156b/ath-miR156b*	+	4.28369	3.8294	0.454285
ath-miR156c/ath-miR156c*	-	4.8872	5.02508	-0.137881
ath-miR156d/ath-miR156d*	-	3.49857	3.88183	-0.383256
ath-miR156f/ath-miR156f*	+	9.19207	10.2551	-1.06301
ath-miR157a/ath-miR157a*	-	2.46502	1.87525	0.589771
ath-miR157b/ath-miR157b*	+	2.46502	1.87525	0.589771
ath-miR157c/ath-miR157c*	-	1.62255	1.86549	-0.242945
ath-miR158a/ath-miR158a*	-	9.04005	9.40518	-0.365133
ath-miR159b/ath-miR159b*	+	7.94525	7.7856	0.159653
ath-miR160a/ath-miR160a*	+	5.83479	5.98028	-0.145491
ath-miR160c/ath-miR160c*	-	-0.531412	-0.434203	-0.0972087
ath-miR162a/ath-miR162a*	-	4.90103	5.12885	-0.227818
ath-miR162b/ath-miR162b*	-	4.89892	5.12701	-0.228095
ath-miR164b/ath-miR164b*	+	2.74051	3.05954	-0.319025
ath-miR164c/ath-miR164c*	+	3.80782	4.24212	-0.434299
ath-miR165a/ath-miR165a*	-	7.76445	7.70191	0.0625427
ath-miR166a/ath-miR166a*	+	7.63281	7.65935	-0.0265453
ath-miR166b/ath-miR166b*	+	7.58807	7.61404	-0.0259753
ath-miR166e/ath-miR166e*	-	9.23981	8.93123	0.308577
ath-miR167a/ath-miR167a*	+	2.79406	2.82983	-0.0357716
ath-miR167c/ath-miR167c*	-	2.72237	2.83884	-0.11647
ath-miR168a/ath-miR168a*	+	1.66687	1.49042	0.176444
ath-miR168b/ath-miR168b*	-	3.73927	3.5116	0.227672
ath-miR169a/ath-miR169a*	-	0.011536	0.0502704	-0.0387343
ath-miR169b/ath-miR169b*	+	3.23053	3.66288	-0.432351
ath-miR169/ath-miR169f*	-	-2.33542	-2.03591	-0.299512
ath-miR169g/ath-miR169g*	-	4.60452	5.53596	-0.931433
ath-miR170-5p/ath-miR170*	-	-0.525468	-0.498042	-0.0274262
ath-miR171a/ath-miR171a*	+	2.62956	2.72413	-0.0945714
ath-miR171b/ath-miR171b*	-	1.86048	2.34673	-0.486252
ath-miR171c/ath-miR171c*	-	0.653474	0.450571	0.202903
ath-miR172b/ath-miR172b*	-	6.56846	6.82361	-0.255155
ath-miR172d/ath-miR172d*	+	7.60661	8.83214	-1.22553
ath-miR172e/ath-miR172e*	+	-1.40014	-0.730672	-0.669471
ath-miR173/ath-miR173*	+	4.28146	4.12082	0.160645
ath-miR1886.2/ath-miR1886.3*	+	-0.839499	-1.20979	0.370287
ath-miR2111a/ath-miR2111a*	+	-5.67393	-3.22274	-2.45119
ath-miR2111b/ath-miR2111b*	+	-3.64287	-2.56214	-1.08073
ath-miR2112-5p/ath-miR2112-3p	-	-3.25595	-3.35818	0.102226
ath-miR2934-5p/ath-miR2934-3p	-	8.43747	8.12041	0.317061
ath-miR3434/ath-miR3434*	-	-1.2333	-1.91789	0.684584
ath-miR3440b-5p/ath-miR3440b-3p	+	-7.2717	-6.63841	-0.633292
ath-miR390a/ath-miR390a*	+	5.18633	5.27454	-0.0882086
ath-miR390b/ath-miR390b*	+	5.1316	5.21614	-0.0845329
ath-miR391/ath-miR391*	+	0.546044	-0.352776	0.898819
ath-miR3932b-5p/ath-miR3932b-3p	-	2.24979	2.07262	0.177172
ath-miR393a/ath-miR393a*	+	3.68721	3.4243	0.262915
ath-miR393b/ath-miR393b*	+	0.0679433	-0.378596	0.446539
ath-miR394b/ath-miR394b*	+	9.51499	9.38516	0.129821
ath-miR396a/ath-miR396a*	-	5.42404	5.68022	-0.256179
ath-miR396b/ath-miR396b*	+	7.19457	7.45005	-0.255487
ath-miR398a/ath-miR398a*	+	2.66433	2.41897	0.245353
ath-miR398b/ath-miR398b*	+	1.18608	1.22205	-0.0359711
ath-miR398c/ath-miR398c*	+	1.18608	1.22205	-0.0359711
ath-miR399c/ath-miR399c*	+	4.50709	4.3091	0.19799
ath-miR403/ath-miR403*	+	4.17931	4.06325	0.116061
ath-miR408/ath-miR408*	+	3.67169	3.59184	0.0798531
ath-miR4228/ath-miR4228*	+	-4.26531	-3.81586	-0.449449
ath-miR447c-5p/ath-miR447c-3p	-	6.06724	5.76553	0.301711
ath-miR472/ath-miR472*	-	1.61545	1.23742	0.37803
ath-miR5014a-5p/ath-miR5014-3p	+	5.04519	1.6041	3.44108
ath-miR5632/ath-miR5632*	-	-5.26761	-2.01951	-3.24809
ath-miR5639/ath-miR5639*	+	0.472461	4.32782	-3.85536
ath-miR5648-5p/ath-miR5648-3p	+	-1.4885	0	-1.4885
ath-miR5654/ath-miR5654*	+	-0.661582	-0.875646	0.214063
ath-miR5663/ath-miR5663*	-	-1.13693	-1.43226	0.295334
ath-miR773b/ath-miR773b*	-	-6.09881	-5.87668	-0.22213
ath-miR774b/ath-miR774b*	+	-4.20264	-3.63786	-0.56478
ath-miR8170-3p/ath-miR8170-5p	+	3.25644	3.43674	-0.180307
ath-miR822/ath-miR822*	-	4.21972	4.34773	-0.128011
ath-miR824/ath-miR824*	+	-0.00503722	-0.0643735	0.0593363
ath-miR829/ath-miR829.2*	-	0.186256	-1.83065	2.01691
ath-miR830/ath-miR830*	-	-1.1199	-1.23087	0.110977
ath-miR831/ath-miR831*	+	2.13688	2.68793	-0.551051
ath-miR832-5p/ath-miR832-3p	+	-0.439285	0.502394	-0.941679
ath-miR833a-5p/ath-miR833-3p	+	0.449312	-0.164654	0.613966
ath-miR835-5p/ath-miR835-3p	-	4.20222	2.69969	1.50254
ath-miR837-5p/ath-miR837-3p	+	-3.74501	-4.62342	0.87841
ath-miR840/ath-miR840*	-	-2.08569	-1.76673	-0.318961
ath-miR841a/ath-miR841*	-	-1.22408	-1.00702	-0.217059
ath-miR841b/ath-miR841b*	+	-3.35469	-4.03219	0.677505
ath-miR844/ath-miR844*	-	0.0148302	0.206045	-0.191214
ath-miR846/ath-miR846*	+	3.39294	3.67692	-0.283982
ath-miR851-5p/ath-miR851-3p	-	5.23303	3.47455	1.75848
ath-miR861-3p/ath-miR861-5p	-	4.08397	3.42392	0.660054
ath-miR862-5p/ath-miR862-3p	+	4.93169	4.29015	0.641545
ath-miR863-3p/ath-miR863-5p	+	0.487691	0.828147	-0.340456
ath-miR864-5p/ath-miR864-3p	+	0.847778	0.17269	0.675088
ath-miR865-3p/ath-miR865-5p	+	0.552895	-0.563914	1.11681
ath-miR866-5p/ath-miR866-3p	-	0.101906	-0.30212	0.404026
ath-miR868-5p/ath-miR868-3p	+	4.56332	4.11536	0.447954
ath-miR870-3p/ath-miR870-5p	-	-2.56337	-2.93041	0.367037

## Sheet: G
Supplementary File 1G. Primers and oligos used in this study
Primer_ID	Sequence	Application
RICE1 For	CACCATGGCCTCATTCGATGGGC	cloning for pENTR-RICE1
RICE1 Rev	TCACTGCTGCAATTGATCGTAG
RICE2 For	CACCATGGCCTCCTTTGATGGGCC	cloning for pENTR-RICE2
RICE2 Rev	TCACTCATCGGACAATTGATCCC
RICE1 For	CACCATGGCCTCATTCGATGGGC	cloning for pENTR-RICE1 Non-stop codon
RICE1 n/s Rev	CTGCTGCAATTGATCGTAG
RICE2 For	CACCATGGCCTCCTTTGATGGGCC	cloning for pENTR-RICE1 Non-stop codon
RICE2 n/s Rev	CTCATCGGACAATTGATCCC
RICE1 D52A For	CCATTGTCTTTGCTGTGTATTG	cloning for pENTR-RICE1 D52A
RICE1 D52A Rev	CAATACACAGCAAAGACAATGG
RICE1 Y54S For	GTCTTTGATGTGTCTTGGGATG	cloning for pENTR-RICE1 Y54S
RICE1 Y54S Rev	CATCCCAAGACACATCAAAGAC
RICE1 D114A For	GATTCAAGAAGCCCTCGCTTTGC	cloning for pENTR-RICE1 D114A
RICE1 D114A Rev	GCAAAGCGAGGGCTTCTTGAATC
RICE1 E187A For	CTGCCATTGCAGGTTGGC	cloning for pENTR-RICE1 E187A
RICE1 E187A Rev	GCCAACCTGCAATGGCAG
RICE1 R47E For	GGAATGGAAACGAGTCCATTG	cloning for pENTR-RICE1 R47E
RICE1 R47E Rev	CAATGGACTCGTTTCCATTCC
RICE1 K119E For	GCTTTGCTTGAAGAAAACCACG	cloning for pENTR-RICE1 K119E
RICE1 K119E Rev	CGTGGTTTTCTTCAAGCAAAGC
AGO10 5' For	CACCATGCCGATTAGGCAAATGAAAG	cloning for pENTR-AGO10 NT
AGO10 CDS NT stop Rev	TTAAGGCTCGATGAATGCAGC
AGO10 CDS PAZ CACC For	CACCATGCTTCCAGTGATAGAG	cloning for pENTR-AGO10 PAZ
AGO10 CDS PAZ stop Rev	TTACCTTTGGCATGTAAC
AGO10 CDS MID CACC For	CACCATGCCGAGGGACAGAGAAAACG	cloning for pENTR-AGO10 MID
AGO10 CDS MID stop Rev	TTACTAACTCTTTGCC
AGO10 CDS PIWI CACC For	CACCATGCTTCTGCTGGCAATATTACC	cloning for pENTR-AGO10 PIWI
AGO10 3' Rev	TTAGCAGTAGAACATTACTCTC
AGO10 5' For	CACCATGCCGATTAGGCAAATGAAAG	cloning for pENTR-AGO10 NT+PAZ
AGO10 CDS PAZ stop Rev	TTACCTTTGGCATGTAAC
AGO10 CDS PAZ CACC For	CACCATGCTTCCAGTGATAGAG	cloning for pENTR-AGO10 PAZ+MID
AGO10 CDS MID stop Rev	TTACTAACTCTTTGCC
AGO10 CDS MID CACC For	CACCATGCCGAGGGACAGAGAAAACG	cloning for pENTR-AGO10 MID+PIWI
AGO10 3' Rev	TTAGCAGTAGAACATTACTCTC
AGO10 CDS PAZ CACC For	CACCATGCTTCCAGTGATAGAG	cloning for pENTR-AGO10 PAZ+MID+PIWI
AGO10 3' Rev	TTAGCAGTAGAACATTACTCTC
pRICE1 For	CACCtggagattgcttggggagca	cloning for pENTR-pRICE1
pRICE1 Rev	tgtggtctgaaatcactggaaac
pRICE2 For	CACCaaagagagagtatactaagcttttg	cloning for pENTR-pRICE2
pRICE2 Rev	gtgatgaaaaaacactaaagaatat
amiR-RICE1-159a-F1	AAGATAGATCTTGATCTGACGATGGAAGGTGTATTGGGATGTCAAATCACATGAGTTGAGCAGGGTA	cloning for pENTR-amiR-RICE1
amiR- RICE1-159a-R1	AAGACCCGGGATGGTGTATTGGGATGTCAAATCAGAAGAGTAAAAGCCATTA
amiR-RICE2-159a-F1	AAGATAGATCTTGATCTGACGATGGAAGGGGATGTGGGGTTTCCTGAAACATGAGTTGAGCAGGGTA	cloning for pENTR-amiR-RICE2
amiR- RICE2-159a-R1	AAGACCCGGGATGGGGATGTGGGGTTTCCTGAAAGAAGAGTAAAAGCCATTA
amiR-RICEs-159a-F1	AAGATAGATCTTGATCTGACGATGGAAGCACCGCTTCTTTGCTTCCAAACATGAGTTGAGCAGGGTA	cloning for pENTR-amiR-RICEs
amiR- RICEs-159a-R1	AAGACCCGGGATGCACCGCTTCTTTGCTTCCAAAGAAGAGTAAAAGCCATTA
Universal primer	GTGCAGGGTCCGAGGT	qRT-PCR
U6_RT_primer	GTGCAGGGTCCGAGGTTTTGGACCATTTCTCGAT	qRT-PCR
U6_RT_For	GGAACGATACAGAGAAGATTAGCA	qRT-PCR
miR166_RT_primer	GTCGTATCCAGTGCAGGGTCCGAGGTATTCGCACTGGATACGACGGGGAA	qRT-PCR
miR166 forward primer	TCGCTTCGGACCAGGCTTCA	qRT-PCR
miR166a/b/c*_RT_primer	GTCGTATCCAGTGCAGGGTCCGAGGTATTCGCACTGGATACGACcctcga	qRT-PCR
miR166a/b/c* forward primer	TCGCTggactgttgtctggc	qRT-PCR
miR166e*_RT_primer	GTCGTATCCAGTGCAGGGTCCGAGGTATTCGCACTGGATACGACcctcga	qRT-PCR
miR166e* forward primer	CGCGCGggaatgttgtctgga	qRT-PCR
miR164_RT_primer	GTCGTATCCAGTGCAGGGTCCGAGGTATTCGCACTGGATACGACtgcacg	qRT-PCR
miR164 forward primer	TCGCCtggagaagcagggca	qRT-PCR
miR164c*_RT_primer	GTCGTATCCAGTGCAGGGTCCGAGGTATTCGCACTGGATACGACCGCACG	qRT-PCR
miR164c* forward primer	GGTCGtggagaagcagggca	qRT-PCR
miR158_RT_primer	GTCGTATCCAGTGCAGGGTCCGAGGTATTCGCACTGGATACGACTGCTTT	qRT-PCR
miR158 forward primer	CGCGCGTCCCAAATGTAGAC	qRT-PCR
miR158a*_RT_primer	GTCGTATCCAGTGCAGGGTCCGAGGTATTCGCACTGGATACGACtttcca	qRT-PCR
miR158* forward primer	GGCGGGCGGctttgtctacaattt	qRT-PCR
3' adapter	AppTCGTATGCCGTCTTCTGCTTG-L	RNA adaptor for the ligation of al-RACE
3' RT primer	CAAGCAGAAGACGGCATACGA	Reverse transcription primer for al-RACE
MYB33 F1	AAGCGACTTTGGGAATCTGA	MYB33 al-RACE
MYB33 F2	AAGAATTCTCGTCGCCTGAA	MYB33 al-RACE
PHB F1	TAACTTGGTCTATGAGAATGGCC	PHB probe for RNA gel blot
PHB R1	GGATACTCTGAGTGTGATACCTG	PHB probe for RNA gel blot
MYB33 NpF	AAGCGACTTTGGGAATCTGA	MYB33-5’ probe for RNA gel blot
MYB33 NpR	AGGAACAATGCCATCCGTAG	MYB33-5’ probe for RNA gel blot
ARF10F1	GGACAAGCGTTTGAGGTTGT	ARF10 al-RACE
ARF10F2	AATGGCGTTTGAAACAGAGG	ARF10 al-RACE
as-miR390	GGCGCTATCCCTCCTGAGCTT	Probe for sRNA gel blot
as-miR166	GGGGAATGAAGCCTGGTCCGA	Probe for sRNA gel blot
as-miR164	TGCACGTGCCCTGCTTCTCCA	Probe for sRNA gel blot
as-siR255	TACGCTATGTTGGACTTAGAA	Probe for sRNA gel blot
as-miR158	TGCTTTGTCTACATTTGGGA	Probe for sRNA gel blot
as-miR165a*	CCTCGATCCAGACAACATTCC	Probe for sRNA gel blot
as-miR165b*	CCTCGATCCAAACAACATTCC	Probe for sRNA gel blot
as-miR166a*	CCTCGAGCCAGACAACAGTCC	Probe for sRNA gel blot
as-miR166b*	CCTCGAGCCAGACAACAGTCC	Probe for sRNA gel blot
as-miR166c*	CCTCGAGCCAGACAACAATCC	Probe for sRNA gel blot
as-miR166d*	CCTCGAGCCAGACAATATTCC	Probe for sRNA gel blot
as-miR166e*	CCTCGTGCCAGACAACATTCC	Probe for sRNA gel blot
as-miR166f*	TCTCGAGCCAGGCATCATTCA	Probe for sRNA gel blot
as-miR166g*	CCTCGAGCCAAACAACATTCC	Probe for sRNA gel blot
as-miR159b*	CCATTGAACTTCAAGGAGCTC	Probe for sRNA gel blot
as-miR160c*	TCATGCTTGACTCCTTGTACG	Probe for sRNA gel blot
as-miR162b*	GATCGATGAACCGCTGCCTCCA	Probe for sRNA gel blot
as-miR164b*	GATGGTGAAGATGGGCACATG	Probe for sRNA gel blot
as-miR167b*	AGTGAGGCTGTCAGAGCATGACC	Probe for sRNA gel blot
as-miR168a*	ATTCAGTTGATGCAAGGCGGG	Probe for sRNA gel blot
as-miR171a*	TCTGAGTGAACCAGGCCAATA	Probe for sRNA gel blot
U6	TCATCCTTGCGCAGGGGCCA	Probe for sRNA gel blot
T7-G3A97_Rev	TTTTTTTTTTTTTTTTTTTTTTTTTTTTTTTTTTTTTTTTTTTTTTTTTTTTTTTTTTTTTTTTTTTTTTTTTTTTTTTTTTTTTTTTTTTTTTTTTCCCTATAGTGAGTCGTATTA	in vitro transcription
T7-G3A67_Rev	TTTTTTTTTTTTTTTTTTTTTTTTTTTTTTTTTTTTTTTTTTTTTTTTTTTTTTTTTTTTTTTTTTTCCCTATAGTGAGTCGTATTA	in vitro transcription
T7-G3A47_Rev	TTTTTTTTTTTTTTTTTTTTTTTTTTTTTTTTTTTTTTTTTTTTTTTCCCTATAGTGAGTCGTATTA	in vitro transcription
T7-G3A18_Rev	TTTTTTTTTTTTTTTTTTCCCTATAGTGAGTCGTATTA	in vitro transcription
T7	TAATACGACTCACTATAG	in vitro transcription
