# Supplementary material for: RISC-interacting clearing 3’- 5’ exoribonucleases (RICEs) degrade uridylated cleavage fragments to maintain functional RISC in Arabidopsis thaliana
Source: eLife. 2017 May 2;6:e24466. doi: 10.7554/eLife.24466 (PMC5451212; doi:10.7554/eLife.24466)
Supplement: Supplementary file 3. — (A) Detailed sequences and ratios of 3’ uridylated tails of 5’ RISC cleavage fragments. (B) Statistic analysis of the average length of 3’ uridylated tail (nt) and percentage of the 5’ fragments with such tails. DOI: http://dx.doi.org/10.7554/eLife.24466.021 [file elife-24466-supp3.xlsx]

## Sheet: A
Supplementary File 3A. 3’ RACE for the uridylated 5’ RISC cleavage fragments in wild type and the transgenic plant overexpressing catalytic inactive RICE1
Target/miRNA	Genotype	untemplated 3'end	Total Clones/Ratio	Average Length (nt)
MYB33/miR159	Ler rp1	u(10), A(1), uU(1), uAU(1), uUA(1), uUU(3), uUUU(3),uUUUUU(1), ACUUUUU(1), uUUAUUU(1), uUUUUUUUU(1)	33 (75.76%)	2.1
	Ler; 35S-HA-RICE1 D52A rp1	u(6), uUG(1), uUU(10), uUUU(5), uUUUU(2), uUGUUU(1), uUUUUUU(1), uUUUUGU(1), uUCAUUA(1), AUUUUUU(1), uUUAUUUUU(1), uUUUAUUUUU(1), uCUUAUUUUUUU(1)	36 (88.89%)	3.7
	Ler rp2	u(4), C(1), uU(5), uUU(5), uUA(1)	18 (88.89%)	1.8
	Ler; 35S-HA-RICE1 D52A rp2	u(1), C(1), uU(2), uCC(1), uUU(6), uUUU(2), uUUUU(1), uUAUUUU(1), uUUUUAUUU(1)	16 (100%)	3.5
	Ler rp3	u(3), uU(1), uCU(1), uUA(1), uUU(4), uUUU(4), uUUUU(1)	22 (68.18%)	2
	Ler; 35S-HA-RICE1 D52A rp3	u(2), C(1), uU(1), uUA(1), uUU(4), uUUU(2), uAUUU(1), uUUUUU(1), AUUAUUU(1), uCUUUUU(1), uUUAUUU(1), uUUUUUUUU(1)	20 (85%)	3.5
ARF10/miR160	Ler rp1	U(2), UU(4), UUU(2), UUUU(2), cUAU(1), UUUUU(1), UAUUUUU(1)	26 (50%)	1.5
	Ler; 35S-HA-RICE1 D52A rp1	U(2), UU(5), UUUUU(1), UUUUUU(1), UUUAUUU(1), UUUUUUU(1), UAUAUUUU(1)	19 (63.16%)	2.4
	Ler rp2	U(6), UU(1), UUUUUU(1), UUGUUUUU(1)	17 (52.94%)	1.3
	Ler; 35S-HA-RICE1 D52A rp2	U(5), UU(1), UUC(1), UUU(1), UUUU(1), UUUUU(1), CUUUUU(1), UUUUUUU(1), UUUUUUUU(1)	24 (58.33%)	1.8
	Ler rp3	U(1), UU(1), UCG(1), UUUAUU(1), UAUUUUA(1), UUUUAUUU(1), UUUUUUUU(1)	20 (35%)	1.8
	Ler; 35S-HA-RICE1 D52A rp3	U(4), UU(1), UUC(1), UUAUUU(1), UUUUUCU(1), UUUUUUUG(1), AAUUUAUUU(1), UUAUUUUUUU(1)	17 (70.59%)	2.9

## Sheet: B
Supplementary File 3B. 3’ RACE for the uridylated 5’ RISC cleavage fragments in wild type and the transgenic plant overexpressing catalytic inactive RICE1
Target Gene/miRNA	Average length of the 3’ tail (nt)
	Ler	Ler;35S-HA-RICE1 D52A	p-value (t-test)
MYB33/miR159	1.97±0.13	3.56 ± 0.14	0.00129955
ARF10/miR160	1.53 ± 0.23	2.35 ± 0.55	0.0419979
Target Gene/miRNA	Percentage of the 5’ fragments with 3’ tail (%)
	Ler	Ler;35S-HA-RICE1 D52A	p-value (t-test)
MYB33/miR159	77.61±10.48%	91.30±7.78%	0.0145921
ARF10/miR160	45.98±9.62%	64.03±6.17%	0.184426
